# Supplementary material for: Linear Skin Defects with Multiple Congenital Anomalies (LSDMCA): An Unconventional Mitochondrial Disorder
Source: PubMed Central journal article supplement (PMC7918533; doi:10.3390/genes12020263), 2021-02-11
Supplement: genes-12-00263-s001.pdf [file genes-12-00263-s001.pdf]

**Supplementary Table S1. Extended clinical description of LSDMCA cases**

| Ref;<br>Case Id | Mutation                                | Linear<br>skin<br>lesions | Micro-<br>/anoph-<br>thalmia | Corneal<br>abnor-<br>malities | Other<br>eye ab-<br>normali-<br>ties | CNS ab-<br>normali-<br>ties | Intellec-<br>tual disa-<br>bilities | Short<br>stat-<br>ure | Cardiac<br>abnor-<br>malities | Genitouri-<br>nary abnor-<br>malities | Nail Dys-<br>trophy | Diaphrag-<br>matic hernia |
|-----------------|-----------------------------------------|---------------------------|------------------------------|-------------------------------|--------------------------------------|-----------------------------|-------------------------------------|-----------------------|-------------------------------|---------------------------------------|---------------------|---------------------------|
| [30];<br>case 1 | X/Y translocation<br>(Xp22.3/Yq11.2)    | +                         | +                            | +                             | +                                    | +                           | -                                   | +                     | -                             | -                                     | -                   | -                         |
| [30];<br>case 2 | X/Y translocation<br>(Xp22.3/Yq11.2)    | +                         | +                            | +                             | +                                    | +                           | -                                   | +                     | -                             | +                                     | -                   | -                         |
| [31]            | 46,X,del(X)<br>(p22.3;pter)             | +                         | +                            | +                             | -                                    | +                           | -                                   | -                     | -                             | -                                     | +                   | -                         |
| [32]            | 46,X,del(X)<br>(p22.2;pter)             | +                         | +                            | +                             | +                                    | -                           | -                                   | NI                    | -                             | -                                     | -                   | -                         |
| [33];<br>case 1 | 46,X,del(X)<br>(p22.2;pter)             | +                         | +                            | -                             | -                                    | +                           | NA                                  | NA                    | -                             | -                                     | -                   | +                         |
| [33];<br>case 2 | 46,X,del(X)<br>(p22.2;pter)             | +                         | -                            | -                             | -                                    | -                           | -                                   | +                     | -                             | -                                     | -                   | -                         |
| [34];<br>case 1 | 46,Xt(2;X)<br>(p25.1;p22.1)             | +                         | -                            | +                             | -                                    | +                           | NI                                  | NI                    | -                             | -                                     | -                   | -                         |
| [34];<br>case 2 | 46,Xt(2;X)<br>(p25.1;p22.1)             | +                         | -                            | +                             | -                                    | +                           | NI                                  | NI                    | -                             | -                                     | -                   | -                         |
| [35]            | 46,X,-X, +<br>der(X)t(X,?)<br>(p22.3;?) | +                         | +                            | +                             | +                                    | +                           | NI                                  | +                     | +                             | -                                     | -                   | -                         |
| [36];<br>case 1 | 46,X,del(X)<br>(p22.11;p22.31)          | +                         | +                            | +                             | +                                    | +                           | -                                   | +                     | -                             | -                                     | -                   | -                         |
| [36];<br>case 2 | del Xp22.3-pter                         | +                         | +                            | +                             | -                                    | +                           | NI                                  | NI                    | +                             | -                                     | +                   | -                         |
| [1];<br>case 1  | 46,X,del(X)<br>(p22.2;pter)             | +                         | +                            | +                             | +                                    | +                           | +                                   | +                     | -                             | -                                     | -                   | -                         |
| [1];<br>case 2  | 46,X,del(X)<br>(p22.2;pter)             | +                         | -                            | -                             | +                                    | -                           | -                                   | +                     | -                             | -                                     | -                   | -                         |

| Ref;<br>Case Id  | Mutation                                        | Linear<br>skin<br>lesions | Micro-<br>/anoph-<br>thalmia | Corneal<br>abnor-<br>malities | Other<br>eye ab-<br>normal-<br>ities | CNS ab-<br>normali-<br>ties | Intellec-<br>tual disa-<br>bilities | Short<br>stat-<br>ure | Cardiac<br>abnor-<br>malities | Genitouri-<br>nary abnor-<br>malities | Nail Dys-<br>trophy | Diaphrag-<br>matic hernia |
|------------------|-------------------------------------------------|---------------------------|------------------------------|-------------------------------|--------------------------------------|-----------------------------|-------------------------------------|-----------------------|-------------------------------|---------------------------------------|---------------------|---------------------------|
| [1];**<br>case 3 | 46,X,del(X)<br>(p22.2;pter)                     | NA                        | NA                           | NA                            | NA                                   | +                           | NA                                  | NA                    | NI                            | NI                                    | NA                  | NI                        |
| [1];<br>case 4   | Xp/Yp exchange<br>(SRY), distal Xp<br>monosomy  | +                         | +                            | -                             | -                                    | -                           | -                                   | +                     | -                             | +                                     | -                   | -                         |
| [37];<br>case 1  | 46,XX,t(X;Y),<br>(p22.3;p11.2)                  | +                         | +                            | +                             | +                                    | +                           | +                                   | -                     | -                             | +                                     | -                   | -                         |
| [37];<br>case 2  | 46,XX,t(X;Y),<br>(p22.3;p11.2)                  | +                         | +                            | -                             | -                                    | NI                          | NI                                  | +                     | NI                            | -                                     | -                   | -                         |
| [38]             | 46,X,del,(X)<br>(p22.1)                         | +                         | +                            | +                             | +                                    | +                           | +                                   | NI                    | +                             | +                                     | -                   | -                         |
| [39]             | Xp/Yp exchange<br>(SRY), distal Xp<br>monosomy  | +                         | +                            | +                             | +                                    | +                           | +                                   | +                     | +                             | +                                     | -                   | -                         |
| [40]             | Xp22.3del, cryptic<br>Yp11.2 transl             | +                         | +                            | +                             | -                                    | +                           | NI                                  | NI                    | +                             | +                                     | -                   | -                         |
| [15]             | 45,X/46,X,r<br>(X)(p22q21)/46,X,<br>del(X)(p22) | +                         | +                            | +                             | +                                    | +                           | -                                   | +                     | -                             | -                                     | +                   | -                         |
| [41]             | 46,X,der(X),t<br>(X:Y)(p22.13;q11.<br>2)        | -                         | +                            | +                             | -                                    | -                           | NI                                  | NI                    | +                             | +                                     | -                   | -                         |
| [42]             | 46,X,der(X),t<br>(X:Y)                          | +                         | +                            | -                             | +                                    | -                           | NI                                  | NI                    | NI                            | -                                     | -                   | -                         |
| [43]             | 46,X,der(X),t(X:3)<br>(p22.2; p22.2)            | -                         | +                            | +                             | +                                    | -                           | -                                   | -                     | -                             | -                                     | -                   | -                         |
| [44]             | 46,X,del(X)<br>(p22.3)                          | -                         | +                            | -                             | +                                    | -                           | NI                                  | NI                    | NI                            | -                                     | -                   | -                         |

| Ref;<br>Case Id   | Mutation                                                              | Linear<br>skin<br>lesions | Micro-<br>/anoph-<br>thalmia | Corneal<br>abnor-<br>malities | Other<br>eye ab-<br>normal-<br>ities | CNS ab-<br>normali-<br>ties | Intellec-<br>tual disa-<br>bilities | Short<br>stat-<br>ure | Cardiac<br>abnor-<br>malities | Genitouri-<br>nary abnor-<br>malities | Nail Dys-<br>trophy | Diaphrag-<br>matic hernia |
|-------------------|-----------------------------------------------------------------------|---------------------------|------------------------------|-------------------------------|--------------------------------------|-----------------------------|-------------------------------------|-----------------------|-------------------------------|---------------------------------------|---------------------|---------------------------|
| [45]              | 46,X,der(X),t<br>(X:Y) (p22.13;<br>p11.2)                             | -                         | +                            | -                             | -                                    | -                           | NI                                  | NI                    | +                             | -                                     | -                   | -                         |
| [46]              | 46,X,der(X)t(X;Y)                                                     | +                         | +                            | +                             | -                                    | +                           | -                                   | -                     | +                             | +                                     | -                   | -                         |
| [47]              | 46,X,del(X)<br>(p22.3-pter)                                           | +                         | +                            | -                             | -                                    | +                           | +                                   | -                     | -                             | +                                     | -                   | -                         |
| [48]              | 46,Y,inv(X)(p22.13<br>~22.2p22.32~22.3<br>3)[49]/46,XY[271]<br>Mosaic | +                         | -                            | -                             | -                                    | +                           | NI                                  | NI                    | +                             | -                                     | -                   | -                         |
| [49];<br>case 1   | 46,X,Xt(X;Y)<br>(p22.3;p11.3)                                         | +                         | +                            | +                             | +                                    | -                           | -                                   | -                     | +                             | +                                     | -                   | -                         |
| [49];<br>case 2   | 46,X,Xt(X;Y)<br>(p22.3;p11.3)                                         | +                         | +                            | +                             | +                                    | -                           | -                                   | -                     | +                             | +                                     | -                   | -                         |
| [50]              | 46,X,Xp22.3 mi-<br>crodel                                             | +                         | +                            | +                             | -                                    | -                           | -                                   | +                     | +                             | -                                     | -                   | -                         |
| [51];<br>case 1   | 46,X,der(X)t(X;Y)                                                     | +                         | +                            | +                             | -                                    | -                           | NI                                  | -                     | +                             | +                                     | -                   | -                         |
| [51];<br>case 2   | 46,X,der(X)t(X;Y)                                                     | +                         | +                            | +                             | -                                    | -                           | NI                                  | -                     | +                             | +                                     | -                   | -                         |
| [51];<br>case 3   | 46,X,der(X)t(X;Y)<br>(p22.3;q11)                                      | +                         | +                            | +                             | +                                    | +                           | NI                                  | -                     | +                             | -                                     | +                   | -                         |
| [51];<br>case 4   | 46,X,der(X)t(X;Y)<br>(p22.3;q11.2)                                    | -                         | -                            | +                             | +                                    | -                           | -                                   | +                     | -                             | -                                     | -                   | -                         |
| [5];<br>BA<br>389 | 46,X,del(X)<br>(p22.22)                                               | +                         | +                            | -                             | +                                    | +                           | +                                   | +                     | -                             | -                                     | -                   | -                         |

| Ref;<br>Case Id        | Mutation                                 | Linear<br>skin<br>lesions | Micro-<br>/anoph-<br>thalmia | Corneal<br>abnor-<br>malities | Other<br>eye ab-<br>normal-<br>ities | CNS ab-<br>normali-<br>ties | Intellec-<br>tual disa-<br>bilities | Short<br>stat-<br>ure | Cardiac<br>abnor-<br>malities | Genitouri-<br>nary abnor-<br>malities | Nail Dys-<br>trophy | Diaphrag-<br>matic hernia |
|------------------------|------------------------------------------|---------------------------|------------------------------|-------------------------------|--------------------------------------|-----------------------------|-------------------------------------|-----------------------|-------------------------------|---------------------------------------|---------------------|---------------------------|
| [5];<br>BA<br>644      | 46,X,der(X),t<br>(X:Y)(p22.22;<br>q11.2) | +                         | +                            | -                             | +                                    | NI                          | NI                                  | +                     | -                             | -                                     | -                   | -                         |
| [5];<br>BA<br>659      | 46,X,der(X),t<br>(X:Y)<br>(p22.22;q25.3) | +                         | +                            | +                             | -                                    | NI                          | +                                   | -                     | -                             | -                                     | -                   | -                         |
| [5];<br>BA<br>745      | 46,X,del(X)<br>(p22.22,p22.22)           | +                         | +                            | +                             | -                                    | -                           | NI                                  | NI                    | -                             | -                                     | -                   | -                         |
| [52];<br>***           | 46,X,der(X)t<br>(X;Y)(p22.2;q11.2)       | +                         | +                            | +                             | +                                    | +                           | NA                                  | NA                    | +                             | +                                     | -                   | -                         |
| [53]                   | 46,X,del(X)<br>(p22.2)                   | +                         | -                            | +                             | +                                    | -                           | -                                   | +                     | -                             | -                                     | -                   | -                         |
| [54]                   | 46,X,del(X)<br>(p22.2;pter)              | +                         | +                            | +                             | +                                    | -                           | +                                   | +                     | -                             | +                                     | -                   | -                         |
| [55];<br>***           | 46,X,del(X)<br>(p22.3)(3,6Mb)            | +                         | +                            | -                             | -                                    | +                           | NA                                  | NA                    | +                             | +                                     | -                   | +                         |
| [56]                   | Xp22.3 ab                                | +                         | +                            | -                             | -                                    | +                           | NI                                  | NI                    | +                             | -                                     | -                   | -                         |
| [57]                   | 46,X,del(X)<br>(p22.2;pter)              | +                         | +                            | +                             | -                                    | +                           | +                                   | +                     | -                             | +                                     | -                   | +                         |
| [58];<br>case<br>III.3 | 46,X,del(X)<br>(p22.2)                   | -                         | +                            | +                             | -                                    | +                           | -                                   | +                     | +                             | -                                     | -                   | -                         |
| [58];<br>case<br>II.1  | 46,X,del(X)<br>(p22.2)                   | -                         | -                            | -                             | -                                    | -                           | -                                   | -                     | -                             | -                                     | -                   | -                         |
| [59];<br>pro-<br>band  | 46,X,del(X)<br>12.9Mb ter del            | +                         | +                            | +                             | +                                    | +                           | + Autis-<br>tic be-<br>haviors      | +                     | -                             | -                                     | NI                  | -                         |

| Ref;<br>Case Id              | Mutation                                                              | Linear<br>skin<br>lesions | Micro-<br>/anoph-<br>thalmia | Corneal<br>abnor-<br>malities | Other<br>eye ab-<br>normal-<br>ities | CNS ab-<br>normali-<br>ties | Intellec-<br>tual disa-<br>bilities | Short<br>stat-<br>ure | Cardiac<br>abnor-<br>malities | Genitouri-<br>nary abnor-<br>malities | Nail Dys-<br>trophy | Diaphrag-<br>matic hernia |
|------------------------------|-----------------------------------------------------------------------|---------------------------|------------------------------|-------------------------------|--------------------------------------|-----------------------------|-------------------------------------|-----------------------|-------------------------------|---------------------------------------|---------------------|---------------------------|
| [59];<br>Mother              | 46,X,del(X)<br>12.9Mb ter del                                         | -                         | -                            | +                             | -                                    | -                           | -                                   | +                     | -                             | -                                     | NI                  | -                         |
| [60];<br>pro-<br>band        | 46,X,del(X)(p22.2)<br>11.5Mb ter del                                  | +                         | +                            | +                             | +                                    | -                           | -                                   | NI                    | +                             | -                                     | +                   | -                         |
| [60];<br>Mother              | 46,X,del(X)(p22.2)<br>11.5Mb ter del                                  | -                         | -                            | -                             | -                                    | -                           | -                                   | -                     | -                             | -                                     | -                   | -                         |
| [29];<br>pro-<br>band        | 46,X,del(X)(p22.2)<br>int del ~220 kb in-<br>cluding <i>HCCS</i>      | -                         | +                            | +                             | +                                    | NI                          | -                                   | -                     | -                             | -                                     | NI                  | -                         |
| [29];<br>mother              | 46,X,del(X)(p22.2)<br>int del ~220 kb in-<br>cluding <i>HCCS</i>      | +                         | +                            | -                             | +                                    | NI                          | -                                   | -                     | -                             | -                                     | NI                  | -                         |
| [13];<br>Patient<br>1; III.1 | 46,X,del(X)(p22.2p<br>22.2), int del ~850<br>kb including <i>HCCS</i> | -                         | +                            | +                             | +                                    | +                           | -                                   | -                     | -                             | -                                     | -                   | -                         |
| [13];<br>Patient<br>1; II.1  | 46,X,del(X)(p22.2p<br>22.2), int del ~850<br>kb including <i>HCCS</i> | -                         | -                            | -                             | -                                    | -                           | -                                   | -                     | -                             | -                                     | -                   | -                         |
| [13];<br>Patient<br>1; II.2  | 46,X,del(X)(p22.2p<br>22.2), int del ~850<br>kb including <i>HCCS</i> | -                         | -                            | -                             | -                                    | -                           | -                                   | -                     | -                             | -                                     | -                   | -                         |
| [13];<br>Patient<br>4        | 46,X,del(X)(p22)                                                      | +                         | +                            | +                             | +                                    | +                           | +                                   | +                     | -                             | -                                     | -                   | -                         |
| [13];<br>Patient<br>5        | 46,X,del(X)(p22)                                                      | +                         | +                            | +                             | -                                    | -                           | +                                   | -                     | -                             | +                                     | -                   | -                         |

| Ref;<br>Case Id                 | Mutation                                                           | Linear<br>skin<br>lesions | Micro-<br>/anoph-<br>thalmia | Corneal<br>abnor-<br>malities | Other<br>eye ab-<br>normal-<br>ities | CNS ab-<br>normali-<br>ties | Intellec-<br>tual disa-<br>bilities | Short<br>stat-<br>ure | Cardiac<br>abnor-<br>malities | Genitouri-<br>nary abnor-<br>malities | Nail Dys-<br>trophy | Diaphrag-<br>matic hernia |
|---------------------------------|--------------------------------------------------------------------|---------------------------|------------------------------|-------------------------------|--------------------------------------|-----------------------------|-------------------------------------|-----------------------|-------------------------------|---------------------------------------|---------------------|---------------------------|
| [13];<br>Patient<br>6           | 46,X,del(X)(p22)<br>int del $\geq$ 3 Mb in-<br>cluding <i>HCCS</i> | +                         | +                            | +                             | -                                    | -                           | -                                   | -                     | -                             | -                                     | -                   | -                         |
| [61]                            | 46,XX,ish<br>del(p22.2p22.31)<br>3,3 Mb del mosaic                 | +                         | +                            | -                             | -                                    | -                           | NI                                  | -                     | +                             | NI                                    | -                   | -                         |
| [62]                            | 46,X,del(X)(p22)                                                   | +                         | +                            | +                             | +                                    | -                           | -                                   | -                     | -                             | +                                     | +                   | -                         |
| [62];<br>mother                 | 46,X,del(X)(p22)                                                   | +                         | -                            | -                             | -                                    | NI                          | NI                                  | NI                    | NI                            | NI                                    | NI                  | NI                        |
| [62];<br>elder<br>daugh-<br>ter | 46,X,del(X)(p22)                                                   | +                         | -                            | -                             | -                                    | NI                          | NI                                  | NI                    | NI                            | NI                                    | NI                  | NI                        |
| [63]                            | 46,X,del(X)(p22.33<br>p22.2) 11Mb del                              | +                         | +                            | -                             | -                                    | +                           | -                                   | NI                    | +                             | -                                     | -                   | +                         |
| [64]                            | 46,XX,del(X)(p22.<br>3p22.2) 11.5Mb del                            | +                         | +                            | +                             | -                                    | +                           | +                                   | +                     | -                             | +                                     | -                   | -                         |
| [66]                            | Xp22.2 ter del                                                     | +                         | +                            | +                             | +                                    | -                           | -                                   | -                     | +                             | +                                     | -                   | +                         |
| [67];<br>case 1                 | Xp22 del                                                           | +                         | +                            | +                             | -                                    | -                           | NI                                  | NI                    | -                             | +                                     | -                   | -                         |
| [67];<br>case 2                 | 46,X,der(X)t (X;Y)                                                 | +                         | +                            | +                             | -                                    | +                           | NI                                  | NI                    | +                             | +                                     | -                   | -                         |
| [2];<br>case<br>II.7            | 8.6kb del spanning<br>5' <i>HCCS</i> and <i>MID1</i>               | +                         | +                            | +                             | -                                    | -                           | -                                   | -                     | +                             | -                                     | -                   | -                         |
| [2];<br>case<br>II.1            | 8.6kb del spanning<br>5' <i>HCCS</i> and <i>MID1</i>               | -                         | -                            | -                             | +                                    | -                           | -                                   | -                     | -                             | -                                     | -                   | -                         |

| Ref;<br>Case Id       | Mutation                                             | Linear<br>skin<br>lesions | Micro-<br>/anoph-<br>thalmia | Corneal<br>abnor-<br>malities | Other<br>eye ab-<br>normal-<br>ities | CNS ab-<br>normali-<br>ties | Intellec-<br>tual disa-<br>bilities | Short<br>stat-<br>ure | Cardiac<br>abnor-<br>malities | Genitouri-<br>nary abnor-<br>malities | Nail Dys-<br>trophy | Diaphrag-<br>matic hernia |
|-----------------------|------------------------------------------------------|---------------------------|------------------------------|-------------------------------|--------------------------------------|-----------------------------|-------------------------------------|-----------------------|-------------------------------|---------------------------------------|---------------------|---------------------------|
| [2];<br>case<br>II.3  | 8.6kb del spanning<br>5' <i>HCCS</i> and <i>MID1</i> | -                         | +                            | -                             | -                                    | NI                          | NA                                  | NA                    | -                             | -                                     | -                   | +                         |
| [2];<br>case I.1      | 8.6kb del spanning<br>5' <i>HCCS</i> and <i>MID1</i> | -                         | -                            | -                             | -                                    | -                           | -                                   | -                     | -                             | -                                     | -                   | -                         |
| [2];<br>case<br>MS1   | point mut <i>HCCS</i>                                | +                         | +                            | +                             | +                                    | +                           | +                                   | -                     | -                             | -                                     | -                   | -                         |
| [2];<br>case<br>MS2   | point mut <i>HCCS</i>                                | -                         | +                            | +                             | -                                    | +                           | +                                   | -                     | +                             | -                                     | -                   | -                         |
| [14]                  | point mut <i>HCCS</i>                                | -                         | +                            | +                             | -                                    | -                           | -                                   | -                     | -                             | -                                     | -                   | -                         |
| [13];<br>Patient<br>2 | point mut <i>HCCS</i>                                | +                         | +                            | +                             | +                                    | +                           | NA                                  | +                     | +                             | -                                     | -                   | -                         |
| [13];<br>Patient<br>3 | point mut <i>HCCS</i>                                | -                         | +                            | +                             | +                                    | NI                          | + <sup>a</sup>                      | -                     | -                             | -                                     | -                   | -                         |
| <b>TOT # cases</b>    |                                                      | <b>56/75</b>              | <b>59/75</b>                 | <b>50/75</b>                  | <b>34/75</b>                         | <b>40/70</b>                | <b>16/50</b>                        | <b>24/54</b>          | <b>25/70</b>                  | <b>21/72</b>                          | <b>6/69</b>         | <b>5/73</b>               |
| <b>%</b>              |                                                      | <b>75</b>                 | <b>79</b>                    | <b>67</b>                     | <b>45</b>                            | <b>57</b>                   | <b>32</b>                           | <b>44</b>             | <b>36</b>                     | <b>29</b>                             | <b>9</b>            | <b>7</b>                  |
| [3];<br>case 1        | point mut <i>COX7B</i>                               | +                         | -                            | -                             | -                                    | +                           | -                                   | +                     | -                             | -                                     | +                   | -                         |
| [3];<br>case 2        | point mut <i>COX7B</i>                               | +                         | -                            | -                             | -                                    | +                           | +                                   | +                     | +                             | +                                     | -                   | +                         |
| [3];<br>case I.2      | point mut <i>COX7B</i>                               | +                         | -                            | -                             | +                                    | +                           | +                                   | -                     | +                             | -                                     | -                   | -                         |

| Ref;<br>Case Id                | Mutation                    | Linear<br>skin<br>lesions | Micro-<br>/anoph-<br>thalmia | Corneal<br>abnor-<br>malities | Other<br>eye ab-<br>normal-<br>ities | CNS ab-<br>normali-<br>ties | Intellec-<br>tual disa-<br>bilities | Short<br>stat-<br>ure | Cardiac<br>abnor-<br>malities | Genitouri-<br>nary abnor-<br>malities | Nail Dys-<br>trophy | Diaphrag-<br>matic hernia |
|--------------------------------|-----------------------------|---------------------------|------------------------------|-------------------------------|--------------------------------------|-----------------------------|-------------------------------------|-----------------------|-------------------------------|---------------------------------------|---------------------|---------------------------|
| [3];<br>case<br>II.4           | point mut <i>COX7B</i>      | +                         | -                            | -                             | +                                    | +                           | + <sup>b</sup>                      | -                     | -                             | -                                     | -                   | -                         |
| <b>TOT # cases</b>             |                             | <b>4/4</b>                | <b>0/4</b>                   | <b>0/4</b>                    | <b>2/4</b>                           | <b>4/4</b>                  | <b>3/4</b>                          | <b>2/4</b>            | <b>2/4</b>                    | <b>1/4</b>                            | <b>1/4</b>          | <b>1/4</b>                |
| <b>%</b>                       |                             | <b>100</b>                | <b>0</b>                     | <b>0</b>                      | <b>50</b>                            | <b>100</b>                  | <b>75</b>                           | <b>50</b>             | <b>50</b>                     | <b>25</b>                             | <b>25</b>           | <b>25</b>                 |
| [4];<br>subject<br>1           | point mut<br><i>NDUFB11</i> | +                         | -                            | -                             | +                                    | -                           | -                                   | NA                    | +                             | -                                     | -                   | -                         |
| [4];<br>subject<br>2           | point mut<br><i>NDUFB11</i> | +                         | -                            | -                             | +                                    | +                           | +                                   | +                     | +                             | -                                     | -                   | -                         |
| [4];<br>mother<br>subject<br>2 | point mut<br><i>NDUFB11</i> | -                         | -                            | -                             | -                                    | -                           | -                                   | -                     | -                             | -                                     | -                   | -                         |
| [4];<br>****                   |                             | NA                        | -                            | -                             | -                                    | +                           | NA                                  | NA                    | +                             | NI                                    | NA                  | NI                        |
| <b>TOT # cases</b>             |                             | <b>2/3</b>                | <b>0/3</b>                   | <b>0/3</b>                    | <b>2/3</b>                           | <b>1/3</b>                  | <b>1/3</b>                          | <b>1/2</b>            | <b>2/3</b>                    | <b>0/3</b>                            | <b>0/3</b>          | <b>0/3</b>                |
| <b>%</b>                       |                             | <b>67</b>                 | <b>0</b>                     | <b>0</b>                      | <b>67</b>                            | <b>33</b>                   | <b>33</b>                           | <b>50</b>             | <b>67</b>                     | <b>0</b>                              | <b>0</b>            | <b>0</b>                  |

\*\*This patient was an aborted fetus with exencephaly and absence of the entire scalp skin. \*\*\*Malformed female infants died 9hs [55] and 5 days [52] after delivery. \*\*\*\*Aborted female fetus from the mother of subject 2. These cases were not considered in the total number of patients for the calculation of the percentage of occurrence of clinical signs as well as all the other patients for which that specific feature had not been studied (NI) or could not be observed (NA) because the patient was too young and so on.

NI, not investigated  
NA, not applicable



<sup>a</sup>mild motor delay; <sup>b</sup>attention deficit disorders (ADHD)

Other Eye abnormalities: prolapsed iris, severe myopia, orbital cyst, hypopigmented and disorganized retinal pigmented epithelium, cataracts, choroidal thickening, coloboma, chorioretinopathy, glaucoma, lens abnormalities, aniridia, pale optic disk and altered visual-evoked potential.

CNS abnormalities: microcephaly, agenesis of the corpus callosum, colpocephaly, seizures, hydrocephalus, ventriculomegaly, cystic cerebral malformation.

Cardiac abnormalities: atrial and ventricular septal defect, atrio-ventricular block, histiocytoid cardiomyopathy, supraventricular tachycardia, junctional ectopic tachycardia, murmur, coarctation of the aorta, aortic stenosis/atresia and patent foramen ovale.

Genitourinary abnormalities: hypospadias, intersexual genitalia, hypoplastic genitalia, imperforate or displaced anus and polycystic ovary syndrome.

Abbreviations: Ref, reference; del, deletion; microdel, microdeletion; ter, terminal; int, interstitial; ab, abnormalities; ADHD attention deficit disorders.

Note: all references were cited in the main text and the number of the references refer to the reference list of the main text.
